# Supplementary material for: Comparison of SARS-CoV-2 Evolution in Paediatric Primary Airway Epithelial Cell Cultures Compared with Vero-Derived Cell Lines
Source: MDPI journal article supplement (doi:10.3390/v14020325), 2022-02-05
Supplement: s1 [file s1]

| PHE VEROE6      |                              |         |     |     |     |     |     |          |        |       |                           |         |
|-----------------|------------------------------|---------|-----|-----|-----|-----|-----|----------|--------|-------|---------------------------|---------|
| POS             | REFERENCE                    | VARIANT | P1  | P2  | P3  | P4A | P4B | CATEGORY | GENE   | S/NS? | CONSEQUENCE               | PROTEIN |
| 7749            | C                            | T       | 0.1 | 12  | 21  | 16  | 19  | MINOR    | ORF1AB | NS    | T2495I                    | NSP3    |
| 8782            | C                            | T       | 97  | 98  | 97  | 97  | 98  | CORE     | ORF1AB | S     |                           |         |
| 9534            | C                            | T       | 0.1 | 0.1 | 2   | 5   | 5   | MINOR    | ORF1AB | NS    | T3090I                    | NSP4    |
| 18488           | T                            | C       | 98  | 97  | 97  | 98  | 96  | CORE     | ORF1AB | NS    | I6075T                    | NSP14   |
| 19983           | C                            | CT      | 7   | 6   | 7   | 9   | 8   | MINOR    | ORF1AB | NS    | FRAMESHIFT. D6576*        | NSP15   |
| 21697           | C                            | T       | 13  | 8   | 4   | 24  | 15  | MINOR    | ORF1AB | S     |                           |         |
| 21761           | GCTATACATGTCTCTGGGACCAATGGTA | G       | 0.1 | 0.1 | 2   | 10  | 6   | MINOR    | SPIKE  | NS    | IHVSGTNGT67-76del         | SPIKE   |
| 21846           | C                            | T       | 17  | 47  | 3   | 0.1 | 0.1 | MINOR    | SPIKE  | NS    | T95I                      | SPIKE   |
| 22100           | G                            | A       | 0.1 | 0.1 | 0.1 | 11  | 15  | MINOR    | SPIKE  | NS    | E180K                     | SPIKE   |
| 22206           | A                            | G       | 0.1 | 0.1 | 0.1 | 8   | 11  | MINOR    | SPIKE  | NS    | D215G                     | SPIKE   |
| 23605           | T                            | G       | 97  | 94  | 0.1 | 0.1 | 0.1 | VARIANT  | SPIKE  | S     |                           |         |
| 23597           | AATTCTCCTCGGGCGGCACGTA       | A       | 0.6 | 4   | 89  | 94  | 94  | VARIANT  | SPIKE  | NS    | NSPRRARSV679I             | SPIKE   |
| 25339           | C                            | T       | 0.1 | 7   | 0.1 | 0.1 | 0.1 | MINOR    | SPIKE  | S     |                           |         |
| 26353           | C                            | T       | 0.1 | 0.1 | 7   | 16  | 19  | MINOR    | E      | NS    | L37F                      | E       |
| 26354           | T                            | G       | 0.1 | 0.1 | 0.1 | 5   | 5   | MINOR    | E      | NS    | L37R                      | E       |
| 28144           | T                            | C       | 96  | 98  | 98  | 97  | 97  | CORE     | ORF8   | NS    | L84S                      | ORF8    |
| 28833           | C                            | T       | 0.1 | 22  | 0.1 | 0.1 | 0.1 | MINOR    | N      | NS    | S187L                     | N       |
| 29366           | A                            | T       | 7   | 34  | 2   | 0.1 | 0.1 | MINOR    | N      | NS    | P365S                     | N       |
| 29596           | C                            | G       | 98  | 98  | 98  | 98  | 98  | CORE     | ORF10  | NS    | I13M                      | ORF10   |
| 29637           | T                            | C       | 0.1 | 0.1 | 0.1 | 6   | 5   | MINOR    | ORF10  | NS    | I27T                      | ORF10   |
| 29844           | AT                           | A       | 0.1 | 11  | 0.1 | 0.1 | 0.1 | MINOR    | 3' UTR | S     |                           | NC      |
| PHE WD-PNECS    |                              |         |     |     |     |     |     |          |        |       |                           |         |
| POS             | REFERENCE                    | VARIANT | P1  | P2  | P3  | P4  |     | CATEGORY | GENE   | S/NS? | CONSEQUENCE               | PROTEIN |
| 241             | C                            | T       | 0.1 | 0.1 | 6   | 0.1 |     | MINOR    | 5'UTR  | S     |                           |         |
| 514             | TGTTATG                      | T       | 2   | 7   | 0.1 | 0.1 |     | MINOR    | ORF1AB | NS    | MV85DEL                   | NSP1    |
| 1593            | C                            | T       | 0.1 | 0.1 | 0.1 | 35  |     | MINOR    | ORF1AB | NS    | S443F                     | NSP2    |
| 2994            | A                            | C       | 0.1 | 0.1 | 0.1 | 7   |     | MINOR    | ORF1AB | NS    | E910A                     | NSP3    |
| 4455            | C                            | T       | 0.1 | 15  | 0.1 | 0.1 |     | MINOR    | ORF1AB | NS    | A1397V                    | NSP3    |
| 4928            | A                            | T       | 0.1 | 0.1 | 0.1 | 46  |     | MINOR    | ORF1AB | NS    | N1555Y                    | NSP3    |
| 6696            | C                            | CT      | 3   | 8   | 0.1 | 1   |     | MINOR    | ORF1AB | NS    | L2146S*                   | NSP3    |
| 6750            | A                            | G       | 0.1 | 7   | 0.1 | 0.1 |     | MINOR    | ORF1AB | NS    | N2162S                    | NSP3    |
| 7444            | A                            | G       | 0.1 | 0.1 | 10  | 0.1 |     | MINOR    | ORF1AB | S     |                           |         |
| 7749            | C                            | T       | 0.1 | 7   | 0.1 | 0.1 |     | MINOR    | ORF1AB | NS    | T2495I                    | NSP3    |
| 7866            | G                            | T       | 0.1 | 0.1 | 6   | 0.1 |     | MINOR    | ORF1AB | NS    | G2534V                    | NSP3    |
| 8782            | C                            | T       | 97  | 99  | 99  | 99  |     | CORE     | ORF1AB | S     |                           |         |
| 9532            | C                            | T       | 0.1 | 15  | 0.1 | 0.1 |     | MINOR    | ORF1AB | S     |                           |         |
| 11074           | C                            | CT      | 1   | 5   | 0.1 | 0.1 |     | MINOR    | ORF1AB | NS    | L3606F*                   | NSP6    |
| 12809           | C                            | T       | 0.1 | 0.1 | 0.1 | 5   |     | MINOR    | ORF1AB | NS    | L4182F                    | NSP9    |
| 12860           | A                            | G       | 0.1 | 0.1 | 10  | 0.1 |     | MINOR    | ORF1AB | NS    | S4199G                    | NSP9    |
| 13604           | G                            | A       | 0.1 | 0.1 | 7   | 0.1 |     | MINOR    | ORF1AB | NS    | R4447H                    | NSP12   |
| 16949           | C                            | T       | 0.1 | 0.1 | 13  | 0.1 |     | MINOR    | ORF1AB | NS    | P5562L                    | NSP13   |
| 17440           | C                            | T       | 0.1 | 35  | 0.1 | 0.1 |     | MINOR    | ORF1AB | NS    | P5726S                    | NSP13   |
| 18063           | TA                           | T       | 0.1 | 0.1 | 9   | 0.1 |     | MINOR    | ORF1AB | NS    | frameshift                |         |
| 18488           | T                            | C       | 98  | 97  | 96  | 97  |     | CORE     | ORF1AB | NS    | I6075T                    | NSP14   |
| 18508           | C                            | T       | 0.1 | 0.1 | 0.1 | 8   |     | MINOR    | ORF1AB | NS    | L6082F                    | NSP14   |
| 19983           | C                            | CT      | 7   | 7   | 0.1 | 6   |     | MINOR    | ORF1AB | NS    | FRAMESHIFT. D6576*        | NSP15   |
| 20178           | C                            | T       | 0.1 | 0.1 | 0.1 | 5   |     | MINOR    | ORF1AB | S     |                           |         |
| 21697           | C                            | T       | 13  | 0.1 | 8   | 0.1 |     | MINOR    | SPIKE  | S     |                           |         |
| 21846           | C                            | T       | 17  | 0.1 | 18  | 2   |     | MINOR    | SPIKE  | NS    | T95I                      | Spike   |
| 23277           | C                            | T       | 0.1 | 0.1 | 10  | 0.1 |     | MINOR    | SPIKE  | NS    | T572I                     | Spike   |
| 23582           | T                            | C       | 0.1 | 0.1 | 9   | 0.1 |     | MINOR    | SPIKE  | NS    | T674H                     | Spike   |
| 23597           | AATTCTCCTCGGGCGGCACGTA       | A       | 6   | 11  | 0   | 2   |     | MINOR    | SPIKE  | NS    | NSPRRARSV679I             | Spike   |
| 23605           | T                            | G       | 97  | 96  | 94  | 95  |     | CORE     | SPIKE  | S     |                           |         |
| 26681           | C                            | T       | 0.1 | 0.1 | 7   | 0.1 |     | MINOR    | M      | S     |                           | M       |
| 27434           | C                            | T       | 0.1 | 0.1 | 6   | 0.1 |     | MINOR    | ORF7A  | NS    | T14I                      | 7A      |
| 27509           | C                            | T       | 0.1 | 0.1 | 6   | 0.1 |     | MINOR    | ORF7A  | NS    | T39I                      | 7A      |
| 27814           | TTG                          | T       | 0.1 | 0.1 | 10  | 0.1 |     | MINOR    | ORF7B  | NS    | FRAMESHIFT                | 7B      |
| 28144           | TTG                          | C       | 96  | 97  | 96  | 98  |     | CORE     | ORF8   | NS    | L84S                      | 8       |
| 28393           | T                            | C       | 0.1 | 11  | 0.1 | 0.1 |     | MINOR    | ORF8   | S     |                           |         |
| 29274           | C                            | T       | 0.1 | 23  | 0.1 | 0.1 |     | MINOR    | N      | NS    | T334I                     | N       |
| 29366           | C                            | T       | 7   | 0.1 | 17  | 0.1 |     | MINOR    | ORF10  | NS    | P365S                     | N       |
| 29596           | A                            | G       | 98  | 98  | 98  | 99  |     | CORE     | 10     | NS    | I13M                      | 10      |
| BT20.1 VERO     |                              |         |     |     |     |     |     |          |        |       |                           |         |
| POS             | REFERENCE                    | VARIANT | P1  | P2  | P3  | P4  |     | CATEGORY | GENE   | S/NS? | CONSEQUENCE               | PROTEIN |
| 241             | C                            | T       | 100 | 100 | 100 | 100 |     | CORE     | 5' UTR | S     |                           |         |
| 635             | C                            | T       | 7   | 0.1 | 0.1 |     |     | MINOR    | ORF1AB | NS    | R124C                     | NSP1    |
| 1420            | C                            | T       | 98  | 99  | 99  |     |     | CORE     | ORF1AB | S     |                           |         |
| 1681            | G                            | A       | 99  | 99  | 99  |     |     | CORE     | ORF1AB | S     |                           |         |
| 3037            | C                            | T       | 98  | 99  | 99  |     |     | CORE     | ORF1AB | S     |                           |         |
| 6255            | C                            | T       | 96  | 99  | 96  |     |     | CORE     | ORF1AB | NS    | A1997V                    | NSP3    |
| 10870           | G                            | T       | 0.1 | 90  | 96  |     |     | VARIANT  | ORF1AB | S     |                           |         |
| 14318           | C                            | T       | 0.1 | 85  | 96  |     |     | VARIANT  | ORF1AB | NS    | T4685I                    | NSP12   |
| 14408           | C                            | T       | 98  | 97  | 98  |     |     | CORE     | ORF1AB | NS    | P4715L                    | NSP12   |
| 16293           | CATACGT                      | C       | 0.1 | 0.1 | 7   |     |     | MINOR    | ORF1AB | NS    | CHANGE                    |         |
| 19983           | C                            | CT      | 8   | 6   | 7   |     |     | MINOR    | ORF1AB | NS    | FRAMESHIFT. D6576*        | NSP15   |
| 22311           | C                            | T       | 6   | 0.1 | 0.1 |     |     | MINOR    | SPIKE  | NS    | T205I                     | SPIKE   |
| 23403           | A                            | G       | 97  | 98  | 99  |     |     | CORE     | SPIKE  | NS    | D614G                     | SPIKE   |
| 23997           | C                            | G       | 0.1 | 84  | 96  |     |     | VARIANT  | SPIKE  | NS    | P812R                     | SPIKE   |
| 25314           | G                            | T       | 3   | 5   | 0.1 |     |     | MINOR    | SPIKE  | NS    | G1251V                    | SPIKE   |
| 25317           | C                            | G       | 3   | 5   | 7   |     |     | MINOR    | SPIKE  | NS    | S1252C                    | SPIKE   |
| 25521           | C                            | T       | 18  | 0.1 | 7   |     |     | MINOR    | ORF3A  | S     |                           |         |
| 27208           | C                            | T       | 8   | 0.1 | 0.1 |     |     | MINOR    | ORF6   | NS    | H3Y                       | ORF6    |
| 27213           | C                            | T       | 9   | 2   | 0.1 |     |     | MINOR    | ORF6   | S     |                           |         |
| 27671           | TTCAAG                       | T       | 100 | 96  | 96  |     |     | CORE     | ORF7A  | NS    | FRAMESHIFT and truncation | ORF7A   |
| 28253           | C                            | T       | 19  | 93  | 99  |     |     | VARIANT  | ORF8   | S     |                           |         |
| 28881           | G                            | A       | 97  | 98  | 99  |     |     | CORE     | N      | NS    | R203K                     | N       |
| 28882           | G                            | A       | 96  | 99  | 99  |     |     | CORE     | N      | S     |                           |         |
| 28883           | G                            | C       | 99  | 99  | 100 |     |     | CORE     | N      | NS    | G204R                     | N       |
| BT20.1 WD-PNECS |                              |         |     |     |     |     |     |          |        |       |                           |         |
| POS             | REFERENCE                    | VARIANT | P1  | P2  | P3  | P4  |     | CATEGORY | GENE   | S/NS? | CONSEQUENCE               | PROTEIN |
| 241             | C                            | T       | 99  | 100 | 99  |     |     | CORE     | 5' UTR | S     |                           |         |
| 1420            | C                            | T       | 99  | 100 | 97  |     |     | CORE     | ORF1AB | S     |                           |         |
| 1681            | G                            | A       | 97  | 98  | 99  |     |     | CORE     | ORF1AB | S     |                           |         |
| 3037            | C                            | T       | 98  | 99  | 99  |     |     | CORE     | ORF1AB | S     |                           |         |
| 6255            | C                            | T       | 91  | 89  | 93  |     |     | CORE     | ORF1AB | NS    | A1997V                    | NSP3    |
| 6683            | AATT                         | A       | 46  | 45  | 52  |     |     | VARIANT  | ORF1AB | NS    |                           |         |
| 14408           | C                            | T       | 99  | 98  | 98  |     |     | CORE     | ORF1AB | NS    | P4715L                    | NSP12   |
| 19983           | C                            | CT      | 7   | 6   | 8   |     |     | MINOR    | ORF1AB | NS    | FRAMESHIFT. D6576         | NSP15   |
| 21101           | G                            | GT      | 1   | 5   | 0.1 |     |     | MINOR    | ORF1AB | NS    | FRAMESHIFT. F6948         | NSP16   |
| 23403           | A                            | G       | 97  | 99  | 98  |     |     | CORE     | SPIKE  | NS    | D614G                     | SPIKE   |
| 25314           | G                            | T       | 0.1 | 6   | 1   |     |     | MINOR    | SPIKE  | NS    | G1251V                    | SPIKE   |
| 25317           | C                            | G       | 0.1 | 6   | 1   |     |     | MINOR    | SPIKE  | NS    | S1252C                    | SPIKE   |
| 27671           | TTCAAG                       | T       | 100 | 98  | 100 |     |     | CORE     | ORF7A  | NS    |                           |         |
| 28881           | G                            | A       | 99  | 97  | 99  |     |     | CORE     | N      | NS    | R203K                     | N       |
| 28882           | G                            | A       | 96  | 97  | 99  |     |     | CORE     | N      | S     |                           |         |
| 28883           | G                            | C       | 99  | 99  | 99  |     |     | CORE     | N      | NS    | G204R                     | N       |
| 29418           | T                            | A       | 0.1 | 5   | 0.1 |     |     | MINOR    | N      | NS    | L382*                     | N       |

**Table S1. Frequency of variants in reference to Wuhan-Hu-1 identified in this study.** Variants only shown where there was at least one instance of frequency >5%. Where undetectable an arbitrary value of 0.1 was assigned. Frequency data is highlighted by colour (green for higher, yellow for lower). Mutations have been assigned status of core, variant or mi-

nor. “Variant” mutations, which are shown in the main figures, have been highlighted in bold text. Additionally, for each variant, data for nucleotide location, reference and variant nucleotides, gene & protein location, and consequence (e.g., synonymous [S] or non-synonymous [NS]) are shown.

a.

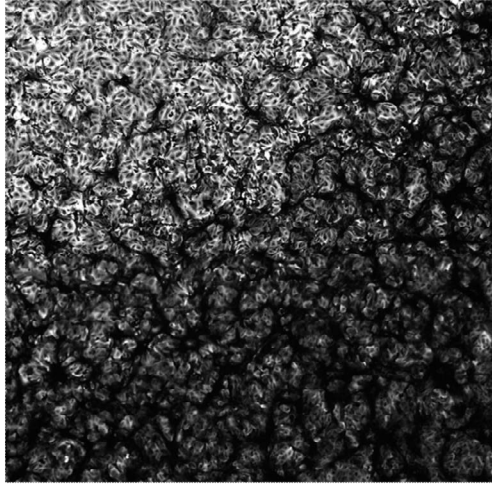

b.

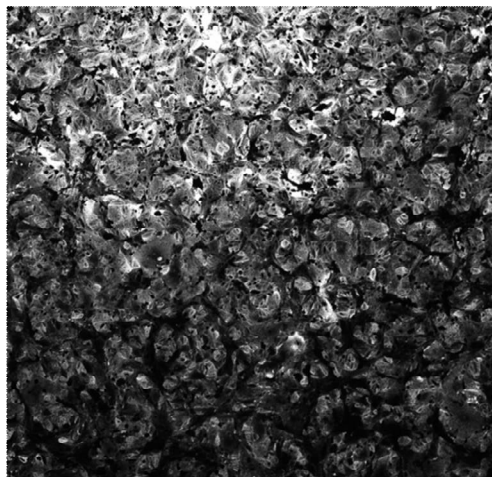

**Figure S1. Fusogenicity of PHE and BT20.1 P4 on Vero cells.** Higher magnification images of plaque visualisation of PHE (a) and BT20.1 (b) P4 on Vero cells from the same images shown in Figure 1.

a.

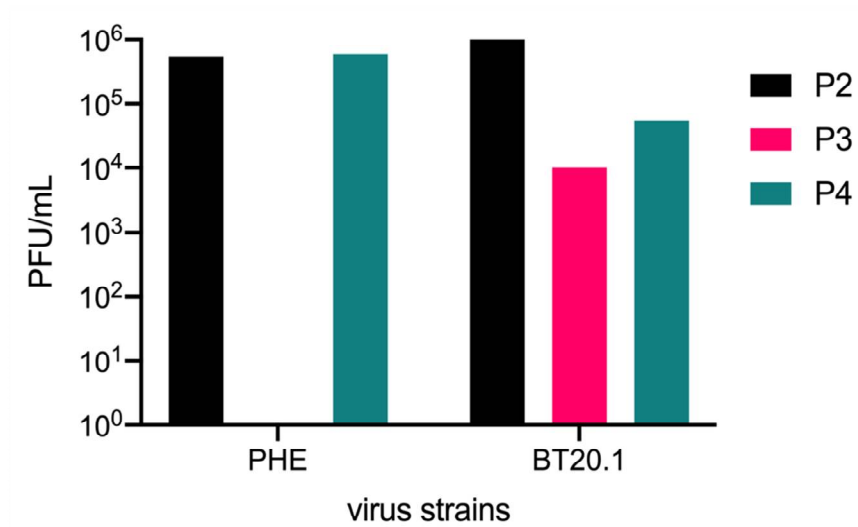

**Figure S2. Growth kinetics of PHE and BT20.1 during passage in WD-PNECs.** Infectivity titres for material generated from isolation/passage of PHE and BT20.1 on WD-PNECs.

a.

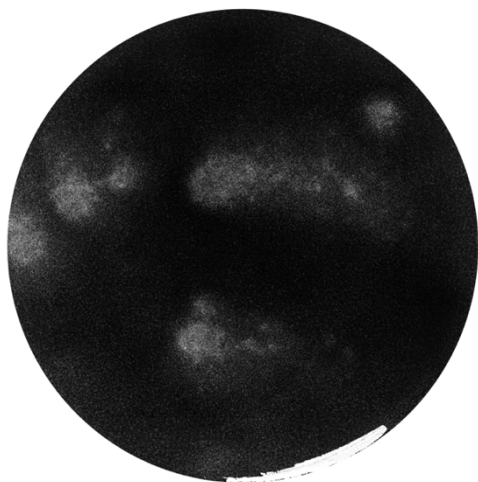

b.

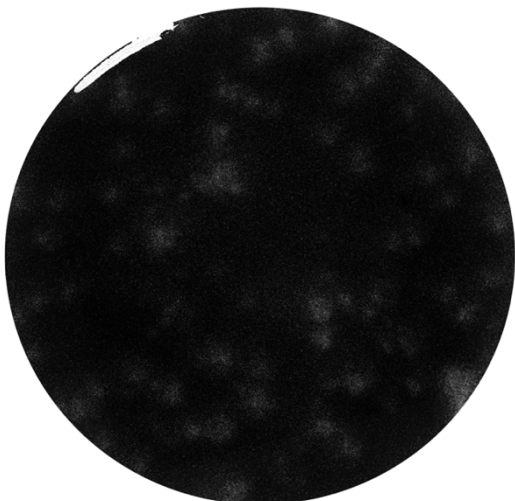

c.

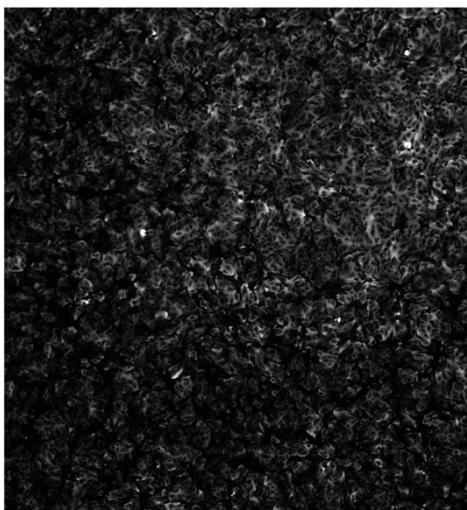

**Figure S3. Plaque morphology of SARS-CoV-2 grown in WD-PNECs.** Plaque visualisation of PHE (a) and BT20.1 (b) P4 on Vero cells. Higher magnification images of plaque visualisation of BT20.1 (c) P4 on Vero cells from the same images shown (b).

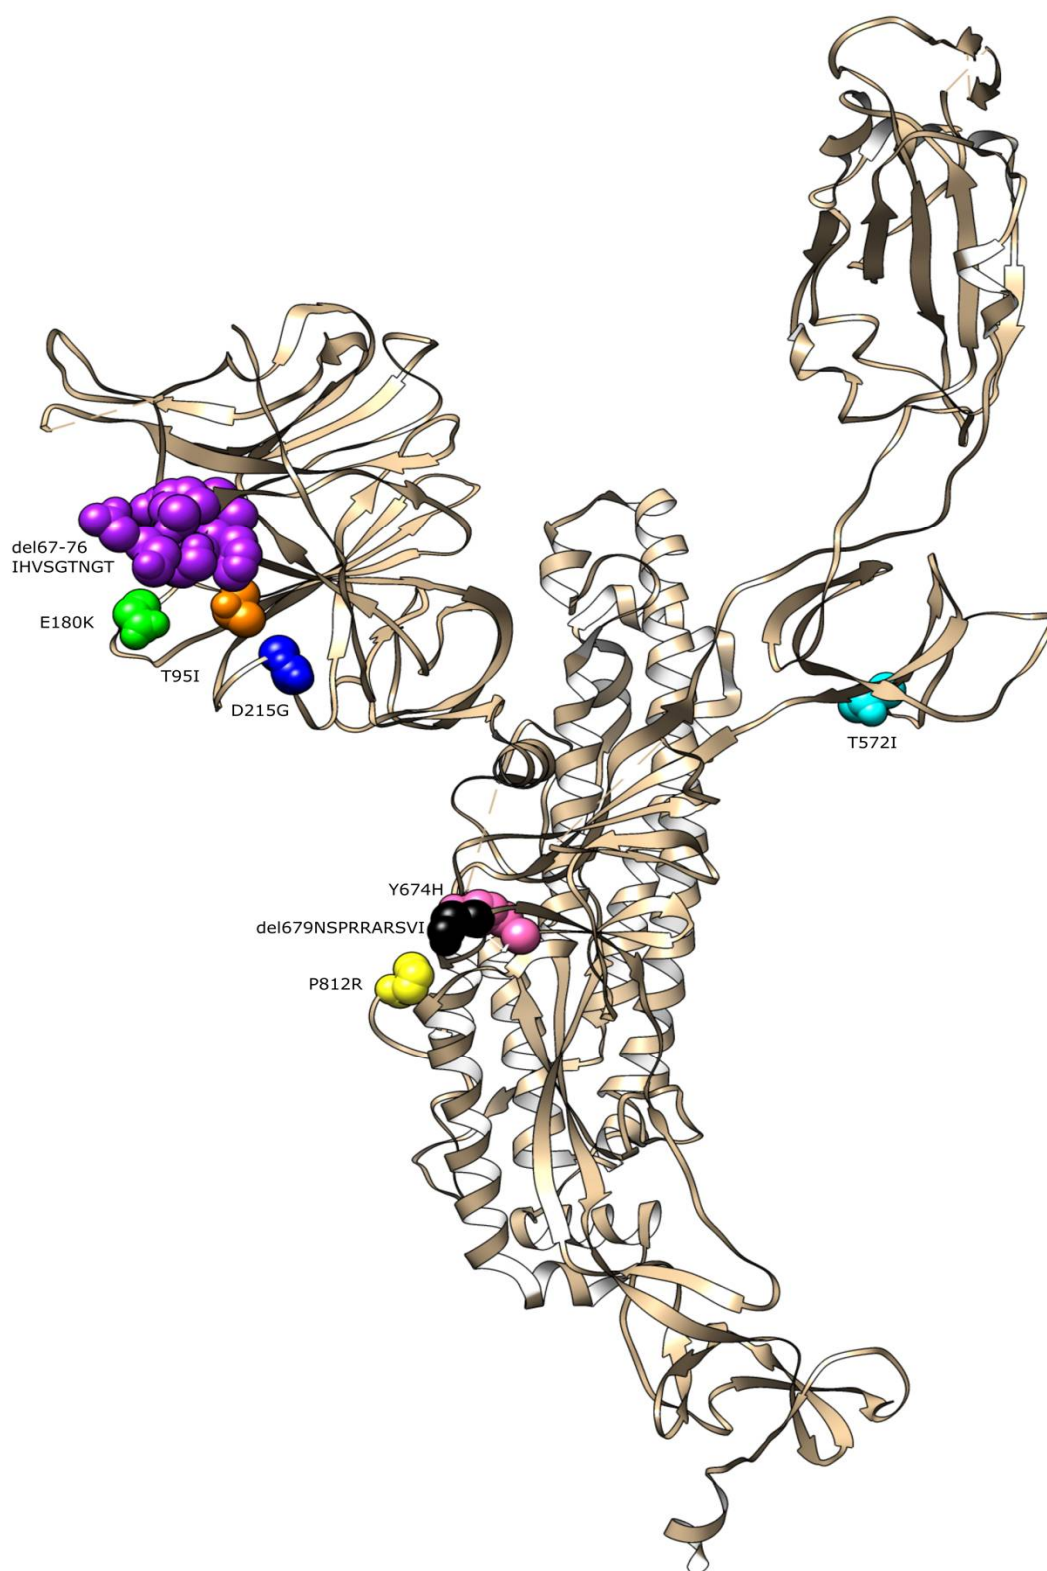

**Figure S4.** Location of Spike mutant variants observed in this study on model structure of a single Spike monomer in the pre-fusion state (PDB 7C2L from [40]). Variants identified in the Spike cytoplasmic tail (G1251V and S1252C) are not shown.
